# Supplementary material for: Subglottic secretion drainage for preventing ventilator-associated pneumonia: an overview of systematic reviews and an updated meta-analysis
Source: PubMed Central journal article supplement — Eur Respir Rev. 2020 Feb 12;29(155):190107. doi: 10.1183/16000617.0107-2019 (PMC9488747; doi:10.1183/16000617.0107-2019), 2020-02-12
Supplement: ERR-0107-2019_figure_S1.pdf [file ERR-0107-2019_figure_S1.pdf]

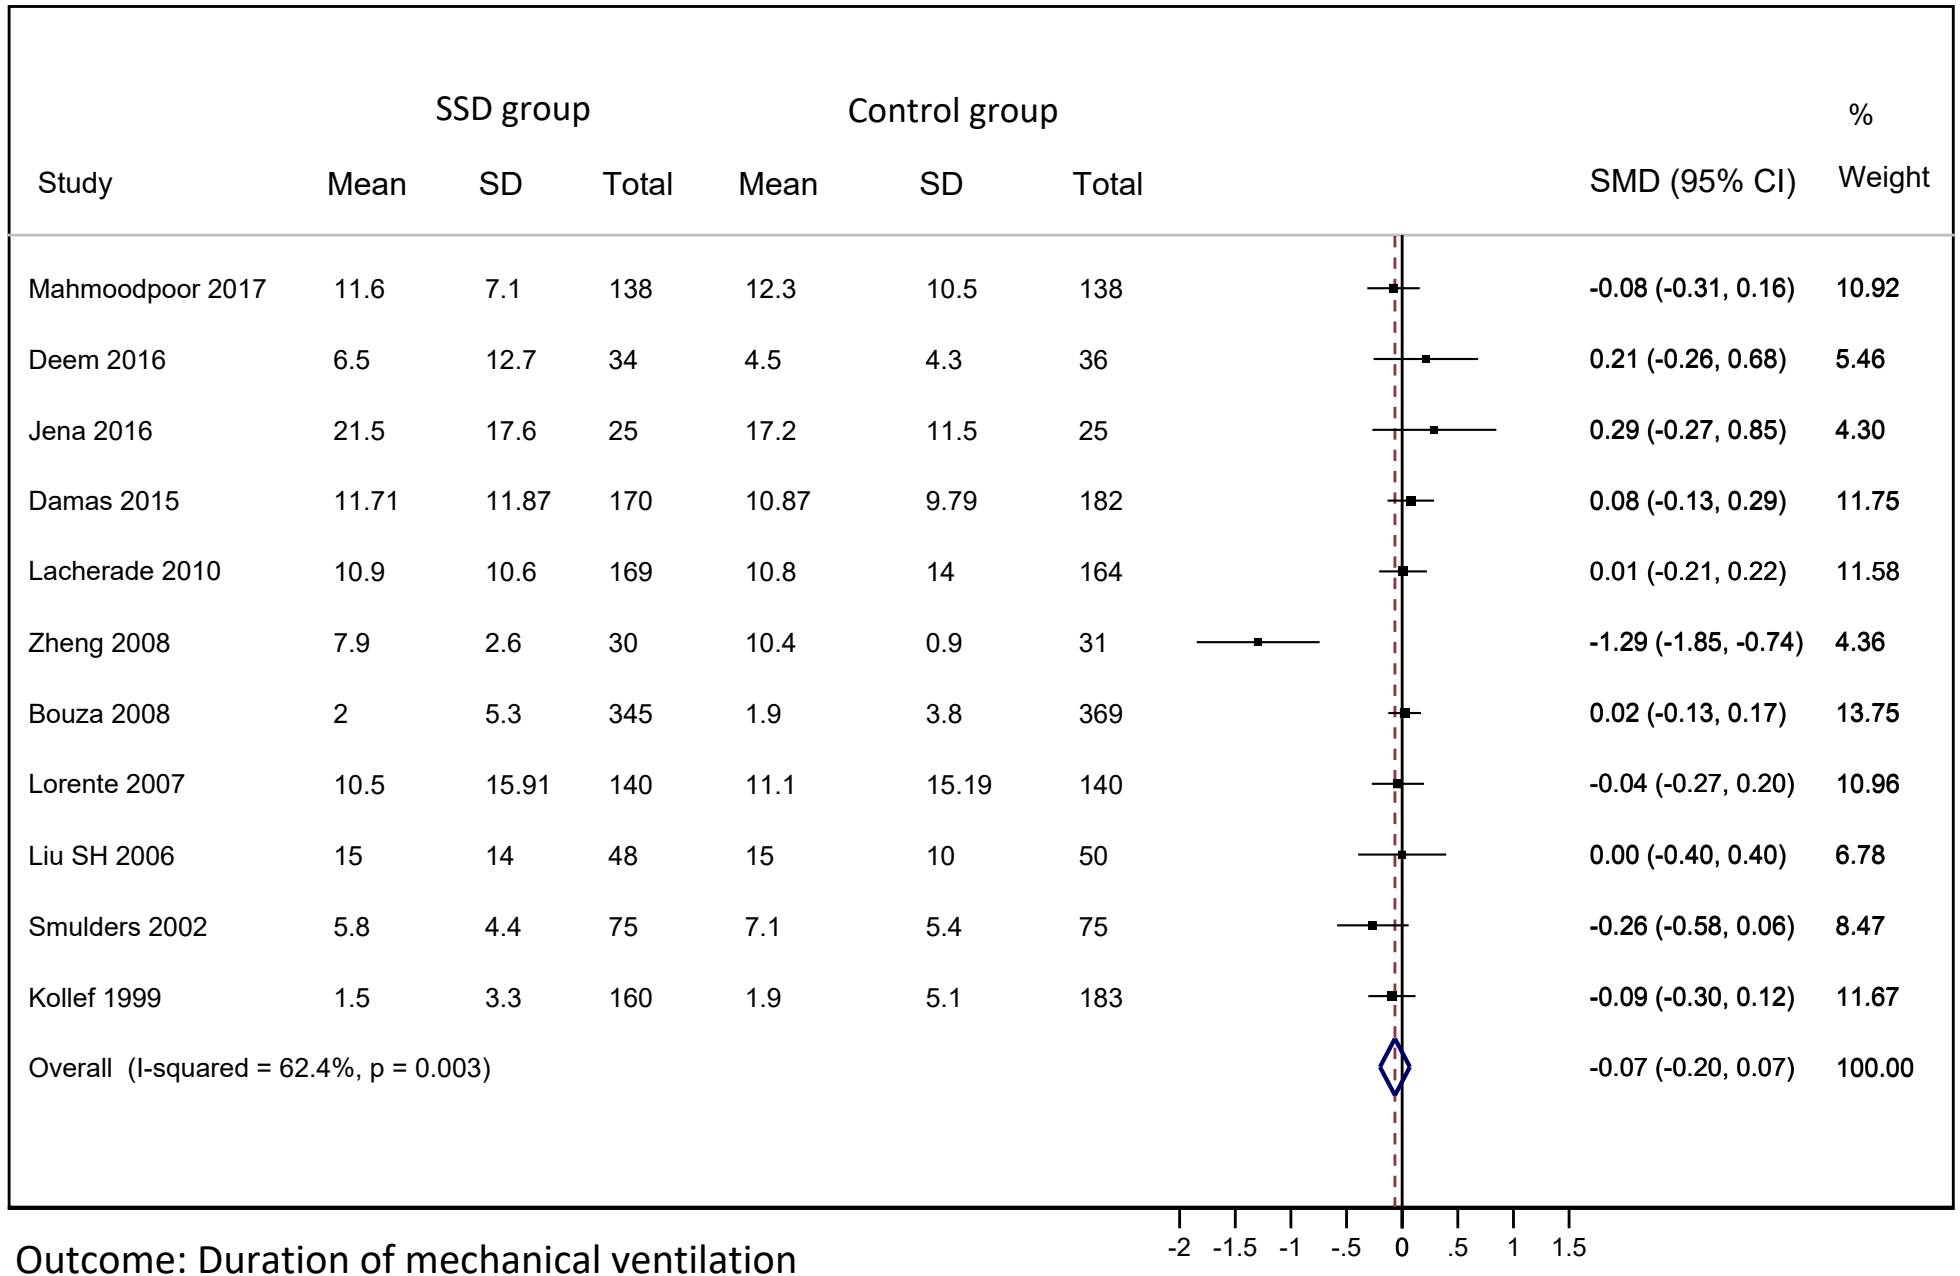

Outcome: Duration of mechanical ventilation

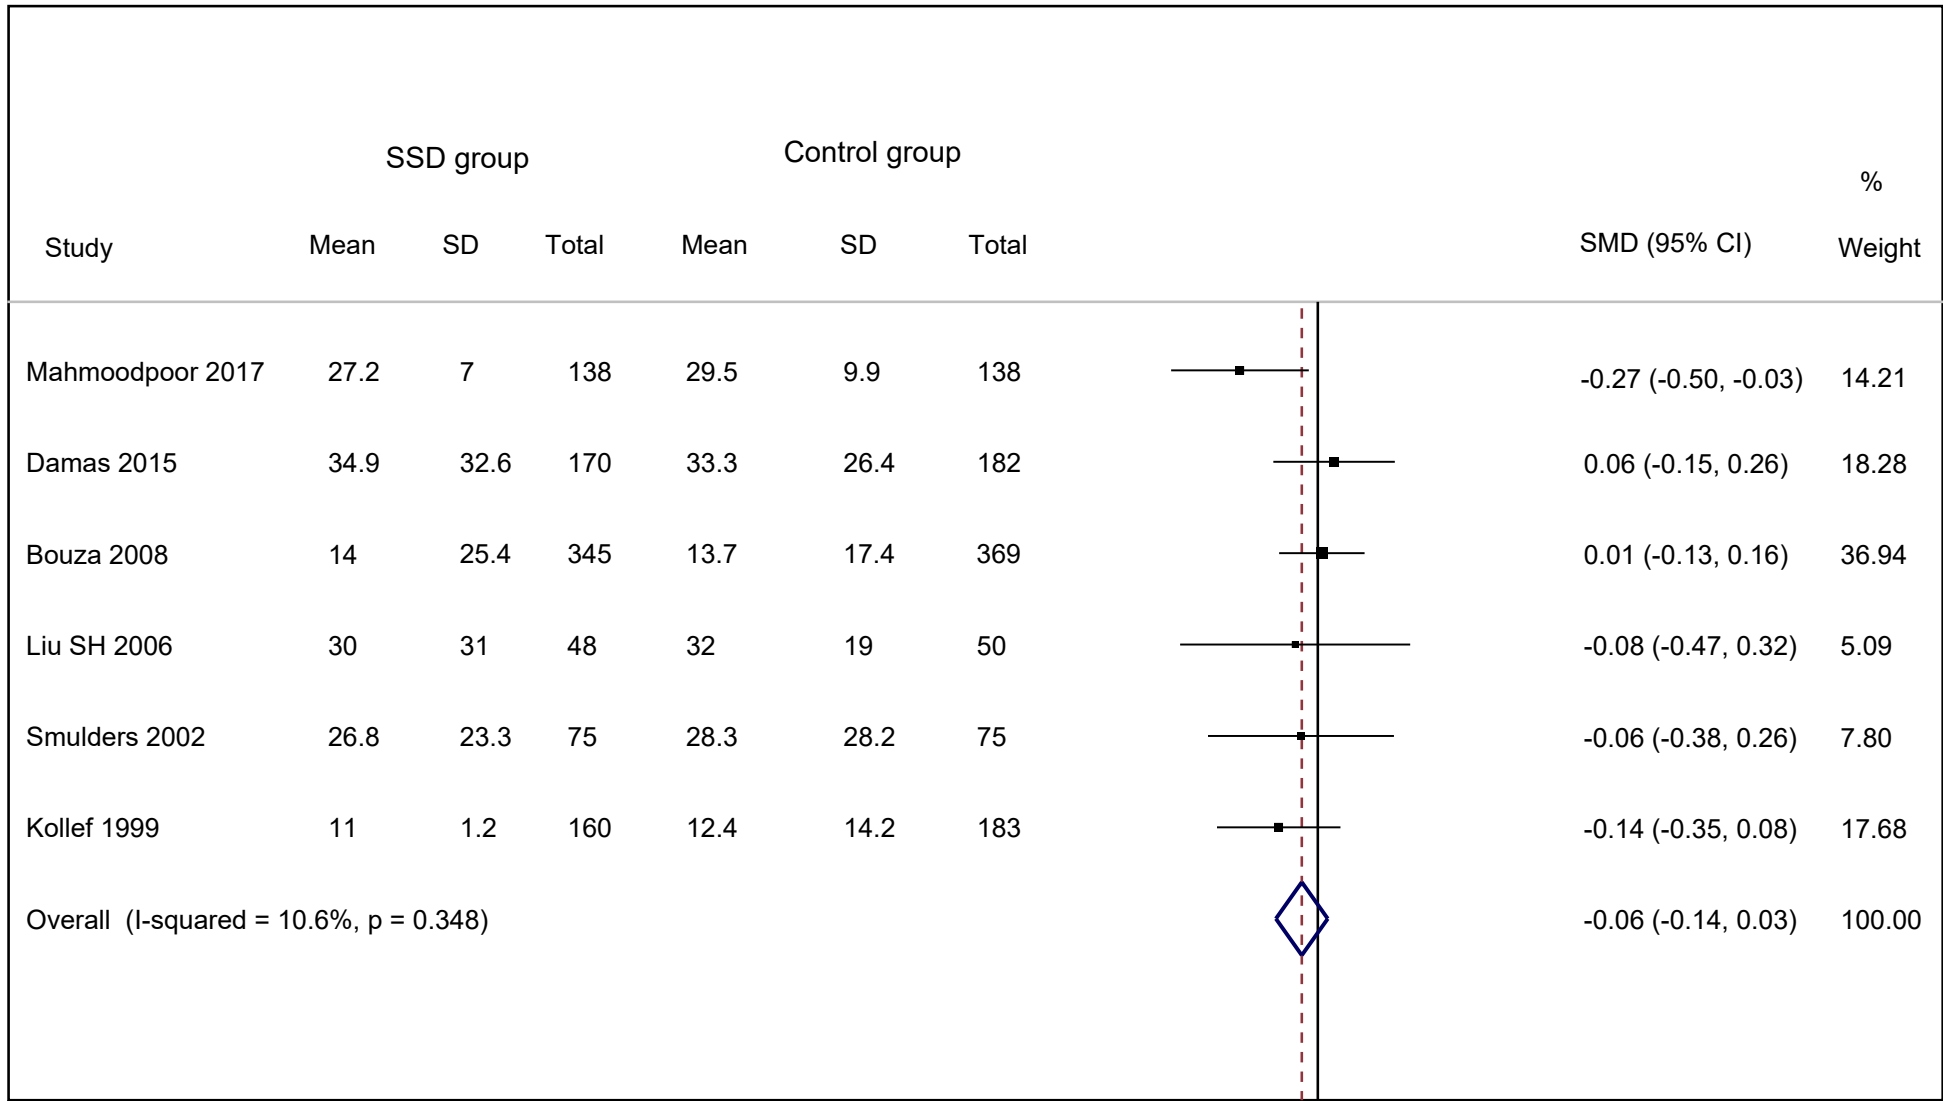

Outcome: Hospital length of stay

-1 -0.5 0 0.5 1

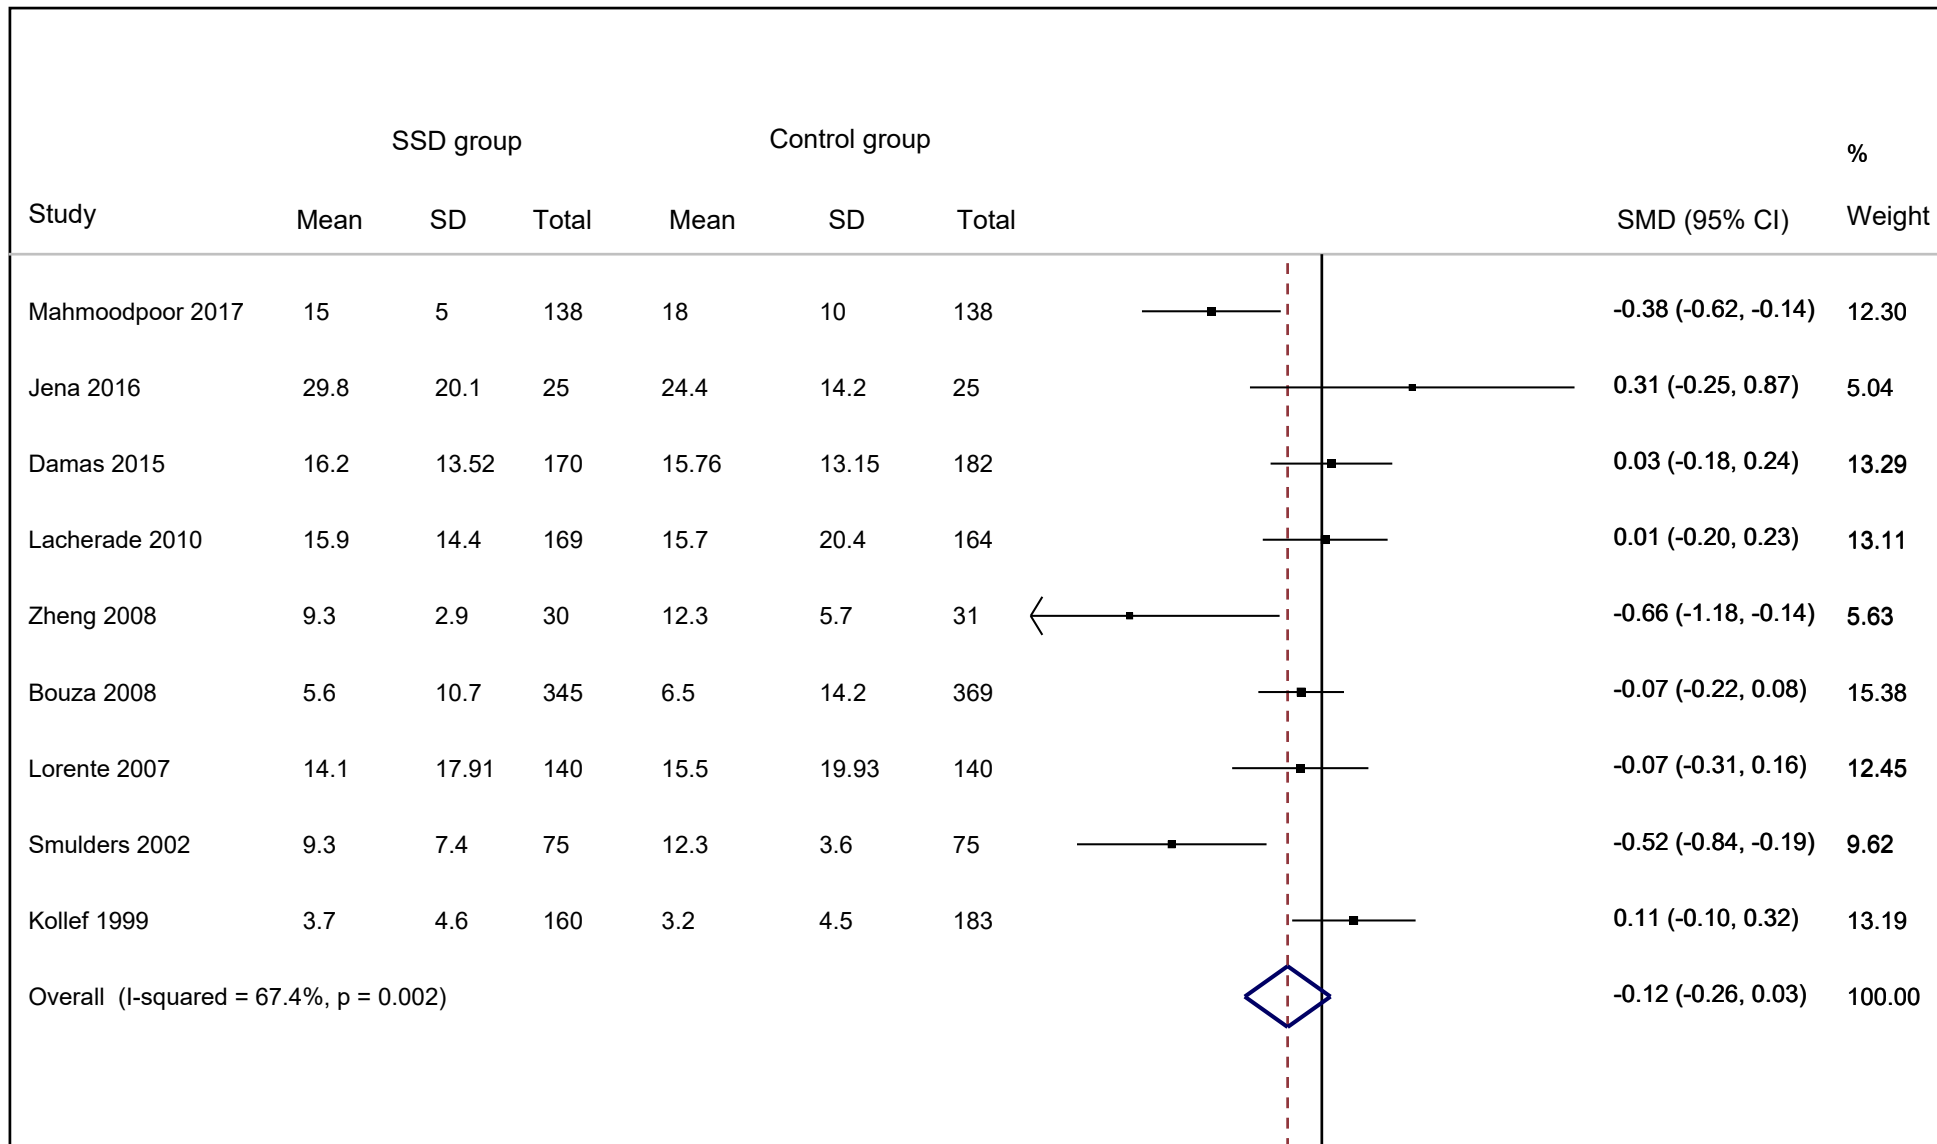

Outcome: ICU length of stay

-1 -0.5 0 0.5 1
