# Supplementary material for: Subglottic secretion drainage for preventing ventilator-associated pneumonia: an overview of systematic reviews and an updated meta-analysis
Source: PubMed Central journal article supplement — Eur Respir Rev. 2020 Feb 12;29(155):190107. doi: 10.1183/16000617.0107-2019 (PMC9488747; doi:10.1183/16000617.0107-2019), 2020-02-12
Supplement: ERR-0107-2019_figure_S2.pdf [file ERR-0107-2019_figure_S2.pdf]

|                         | Random sequence generation | Allocation concealment | Blinding of outcome assessment | Incomplete outcome data | Selective reporting | Other bias |
|-------------------------|----------------------------|------------------------|--------------------------------|-------------------------|---------------------|------------|
| Mahmoodpoor et al. 2017 | ●                          | ●                      | ●                              | ●                       | ●                   | ●          |
| Deem et al. 2016        | ●                          | ●                      | ●                              | ●                       | ●                   | ●          |
| Jena et al. 2016        | ●                          | ●                      | ●                              | ●                       | ●                   | ●          |
| Gopal et al. 2015       | ●                          | ●                      | ●                              | ●                       | ●                   | ●          |
| Damas et al. 2015       | ●                          | ●                      | ●                              | ●                       | ●                   | ●          |
| Tao et al. 2014         | ●                          | ●                      | ●                              | ●                       | ●                   | ●          |
| Seyfi et al. 2013       | ●                          | ●                      | ●                              | ●                       | ●                   | ●          |
| Lacherade et al. 2010   | ●                          | ●                      | ●                              | ●                       | ●                   | ●          |
| Zheng et al. 2008       | ●                          | ●                      | ●                              | ●                       | ●                   | ●          |
| Yang et al. 2008        | ●                          | ●                      | ●                              | ●                       | ●                   | ●          |
| Bouza et al. 2008       | ●                          | ●                      | ●                              | ●                       | ●                   | ●          |
| Lorente et al. 2007     | ●                          | ●                      | ●                              | ●                       | ●                   | ●          |
| Liu QH et al. 2006      | ●                          | ●                      | ●                              | ●                       | ●                   | ●          |
| Liu SH et al. 2006      | ●                          | ●                      | ●                              | ●                       | ●                   | ●          |
| Girou et al. 2004       | ●                          | ●                      | ●                              | ●                       | ●                   | ●          |
| Smulders et al. 2002    | ●                          | ●                      | ●                              | ●                       | ●                   | ●          |
| Bo et al. 2000          | ●                          | ●                      | ●                              | ●                       | ●                   | ●          |
| Kollef et al. 1999      | ●                          | ●                      | ●                              | ●                       | ●                   | ●          |
| Valles et al. 1995      | ●                          | ●                      | ●                              | ●                       | ●                   | ●          |
| Mahul et al. 1992       | ●                          | ●                      | ●                              | ●                       | ●                   | ●          |

● Low risk of bias  
 ● Unclear risk of bias  
 ● High risk of bias

**Figure S2.** Risk of bias assessments for included randomized controlled trials
