# Supplementary material for: Subglottic secretion drainage for preventing ventilator-associated pneumonia: an overview of systematic reviews and an updated meta-analysis
Source: PubMed Central journal article supplement — Eur Respir Rev. 2020 Feb 12;29(155):190107. doi: 10.1183/16000617.0107-2019 (PMC9488747; doi:10.1183/16000617.0107-2019), 2020-02-12
Supplement: ERR-0107-2019_table_S1.pdf [file ERR-0107-2019_table_S1.pdf]

**Table S1. Characteristics of reviews included in the overview**

| Author, year published | RCTs /participants | Eligibility criteria                                                                                                                             |                                                                                                                                       | Outcomes results                                                                        | Limitations                                                                                                                                                                   |
|------------------------|--------------------|--------------------------------------------------------------------------------------------------------------------------------------------------|---------------------------------------------------------------------------------------------------------------------------------------|-----------------------------------------------------------------------------------------|-------------------------------------------------------------------------------------------------------------------------------------------------------------------------------|
|                        |                    | Inclusion                                                                                                                                        | Exclusion                                                                                                                             |                                                                                         |                                                                                                                                                                               |
| Huang et al, 2018      | 9/2126             | Patients received MV;<br>Intervention: SSD;<br>Control: non-subglottic secretion suctioning, standard endotracheal tubes;<br>RCTs                | Studies in which the primary outcome was not the microorganisms of VAP.                                                               | Incidence of VAP                                                                        | Possible selection bias related to RCTs included/excluded. The limitations of each RCT included.                                                                              |
| Sun et al, 2017        | 13/2052            | Patients received MV hospitalized in an ICU;<br>Intervention: SSD;<br>Control: non-subglottic secretion suctioning;<br>Incidence of VAP;<br>RTCs | Patients younger than 18 years old;<br>Outcomes not available;<br>Reviews or case reports;<br>Non-Chinese and non-English literature. | Incidence of VAP<br>ICU/Hospital mortality<br>Duration of MV<br>Hospital length of stay | Impossible to conduct a meta-analysis based on the complications (tracheal mucosal injury, haemorrhage...). Possible selection bias.                                          |
| Mao et al, 2016        | 20 / 3544          | Patients received MV;<br>Intervention: SSD;<br>Control: non-subglottic secretion suctioning;<br>Incidence of VAP;<br>RTCs                        | Patients younger than 18 years old;<br>Repeat data.                                                                                   | Incidence of VAP<br>ICU / Hospital mortality<br>Duration of MV<br>ICU length of stay    | RCTs performed in different patient groups. SSD not blinded for physicians and nurses. Confounding interventions in some included RCTs. Cost-effectiveness of SSD unavailable |

**Table S1. Characteristics of reviews included in the overview**

| Author, year published | RCTs /participants | Eligibility criteria                                                                                                                                               |                                                               | Outcomes results                                                                                              | Limitations                                                                                                                                                     |
|------------------------|--------------------|--------------------------------------------------------------------------------------------------------------------------------------------------------------------|---------------------------------------------------------------|---------------------------------------------------------------------------------------------------------------|-----------------------------------------------------------------------------------------------------------------------------------------------------------------|
|                        |                    | Inclusion                                                                                                                                                          | Exclusion                                                     |                                                                                                               |                                                                                                                                                                 |
| Caroff et al, 2016     | 17 / 3369          | Adults received MV;<br>Intervention: SSD;<br>Control: standard endotracheal tubes;<br>Incidence of VAP;<br>RTCs                                                    | N/A                                                           | Incidence of VAP<br>ICU / Hospital mortality<br>Duration of MV<br>ICU length of stay                          | Variability in VAP definitions, inclusion criteria, study populations and study quality. High heterogeneity for duration of MV and ICU length of stay outcomes. |
| Frost et al, 2013      | 9 / 2280           | Patients received MV;<br>Intervention: SSD;<br>Control: non-subglottic secretion suctioning;<br>Incidence of VAP;<br>RTCs                                          | Studies with others cointerventions in the intervention group | Incidence of VAP<br>ICU / Hospital mortality<br>Duration of MV<br>ICU/ hospital length of stay<br>Time to VAP | Possible selection bias related to RCTs included/excluded. Significant heterogeneity between study population and generalization of results.                    |
| Leasure et al, 2012    | 10 / 1709          | Patients received MV hospitalized in an ICU;<br>Intervention: SSD;<br>Control: non-subglottic secretion suctioning;<br>Incidence of VAP;<br>RTCs/ factorial design | Studies with others cointerventions in the intervention group | Incidence of VAP<br>ICU / Hospital mortality<br>Duration of MV<br>ICU/ hospital length of stay<br>Time to VAP | Possible publication bias. Intermittent/ continuous SSD technique indistinctly.                                                                                 |

**Table S1. Characteristics of reviews included in the overview**

| Author, year published | RCTs /participants | Eligibility criteria                                                                                                                                                                                                     |           | Outcomes results                                                                                                 | Limitations                                                                                                                                                                                                                           |
|------------------------|--------------------|--------------------------------------------------------------------------------------------------------------------------------------------------------------------------------------------------------------------------|-----------|------------------------------------------------------------------------------------------------------------------|---------------------------------------------------------------------------------------------------------------------------------------------------------------------------------------------------------------------------------------|
|                        |                    | Inclusion                                                                                                                                                                                                                | Exclusion |                                                                                                                  |                                                                                                                                                                                                                                       |
| Wang et al, 2012       | 10 / 2213          | Adults patients undergoing MV;<br>Intervention: endotracheal tubes with SSD functionality;<br>Control: not SSD with endotracheal tubes with SSD functionality or standard endotracheal tube<br>Incidence of VAP;<br>RTCs | N/A       | Incidence of VAP<br>Overall mortality<br>Duration of MV<br>ICU / Hospital length of stay<br>Time to VAP          | High risk of bias of included RCTs (only two had low risk of bias).<br>Variability in VAP definitions, inclusion criteria, study populations, methods of SSD and concurrent measures.<br>Did not intention-to-treat data from trials. |
| Muscudere et al, 2011  | 13 / 2442          | Adults critically patients received MV;<br>Intervention: SSD;<br>Control: standard endotracheal tube<br>Incidence of VAP;<br>RTCs                                                                                        | N/A       | Incidence of VAP<br>ICU / Hospital mortality<br>Duration of MV<br>ICU length of stay                             | Minimal data reported on airway difficulties with SSD.<br>The majority of RCTs used the same endotracheal tube with SSD, is not possible generalize to other tubes with SSD.                                                          |
| Dezfulian et al, 2005  | 5/ 896             | Patients undergoing MV;<br>Intervention: SSD<br>Control: not SSD<br>Incidence of VAP;<br>RTCs                                                                                                                            | N/A       | Risk of/ Incidence of VAP<br>Overall mortality<br>Duration of MV<br>ICU / Hospital length of stay<br>Time to VAP | Moderate quality of RCTs.<br>Clinical and statistical heterogeneity.                                                                                                                                                                  |

MV, mechanical ventilator; N/A, not available; SSD, subglottic secretion drainage; VAP, ventilator-associated pneumonia; RCTs, randomized controlled trials; ICU, intensive care unit
