# Supplementary material for: Subglottic secretion drainage for preventing ventilator-associated pneumonia: an overview of systematic reviews and an updated meta-analysis
Source: PubMed Central journal article supplement — Eur Respir Rev. 2020 Feb 12;29(155):190107. doi: 10.1183/16000617.0107-2019 (PMC9488747; doi:10.1183/16000617.0107-2019), 2020-02-12
Supplement: ERR-0107-2019_table_S2.pdf [file ERR-0107-2019_table_S2.pdf]

**Table S2. Overview of reviews results**

| Author, year published         | Number of RCTs | Effect size (95% CI) <sup>a</sup> | Quality of evidence (GRADE) | Heterogeneity (I <sup>2</sup> statistic, p value) |
|--------------------------------|----------------|-----------------------------------|-----------------------------|---------------------------------------------------|
| <b>VAP incidence</b>           |                |                                   |                             |                                                   |
| Huang et al, 2018 <sup>b</sup> | 9              | 0.59 (0.48 to 0.75), p < 0.00001  | Low                         | 0%; p = 0.47                                      |
| Sun et al, 2017                | 13             | 0.54 (0.46 to 0.64), p < 0.00001  | Moderate                    | 0%; p = 0.72                                      |
| Mao et al, 2016                | 20             | 0.55 (0.48 to 0.63), p < 0.00001  | High                        | 0%; p = 0.85                                      |
| Caroff et al, 2016             | 17             | 0.58 (0.51 to 0.67), p < 0.00001  | Moderate                    | 0%; p = 0.74                                      |
| Frost et al, 2013              | 9              | 0.52 (0.42 to 0.65), p = N/A      | Very low                    | N/A; p = 0.87                                     |
| Leasure et al, 2012            | 10             | 0.52 (0.43 to 0.64), p < 0.00001  | Very low                    | 0%; p = 0.92                                      |
| Wang et al, 2012               | 10             | 0.56 (0.45 to 0.69), p < 0.00001  | Moderate                    | 0%; p = 0.94                                      |
| Muscedere et al, 2011          | 13             | 0.55 (0.46 to 0.66), p < 0.00001  | Moderate                    | 0%; p = 0.80                                      |
| Dezfulian et al, 2005          | 5              | 0.51 (0.33 to 0.71), p = N/A      | Very low                    | N/A; p = 0.87                                     |
| <b>Overall mortality</b>       |                |                                   |                             |                                                   |
| Sun et al, 2017                | 7              | 0,89 ( 0,73 to 1,09), p = 0,25    | Moderate                    | 0%; p = 0.90                                      |
| Caroff et al, 2016             | 14             | 0.93 (0.84 to 1.03), p = 0.19     | Moderate                    | 0%; p = 0.69                                      |
| Leasure et al, 2012            | 9              | 0.91 (0.80 to 1.05), p = 0.21     | Very low                    | 0%; p = 0.95                                      |
| Wang et al, 2012               | 9              | 0.97 (0.84 to 1.12), p = 0.65     | Moderate                    | 0%; p = 0.82                                      |
| Dezfulian et al, 2005          | 4              | 1.1 (0.80 to 1.4), p = N/A        | Very low                    | N/A; N/A                                          |
| <b>Hospital mortality</b>      |                |                                   |                             |                                                   |

**Table S2. Overview of reviews results**

| Author, year published                    | Number of RCTs | Effect size (95% CI) <sup>a</sup>           | Quality of evidence (GRADE) | Heterogeneity (I <sup>2</sup> statistic, p value) |
|-------------------------------------------|----------------|---------------------------------------------|-----------------------------|---------------------------------------------------|
| Mao et al, 2016                           | 7              | 0,92 ( 0,80 to 1,05), p = 0,20              | High                        | 0%; p = 0.82                                      |
| Frost et al, 2013                         | 4              | 0.96 (0.81 to 1.12), p = N/A                | Very low                    | N/A                                               |
| Muscedere et al, 2011                     | 6              | 0.97 (0.83 to 1.13), p = 0.65               | Moderate                    | 0%; p = 0.98                                      |
| <b>ICU mortality</b>                      |                |                                             |                             |                                                   |
| Mao et al, 2016                           | 8              | 0,98 ( 0,85 to 1,13), p = 0,77              | High                        | 0%; p = 0.88                                      |
| Frost et al, 2013                         | 4              | 1.05 (0.86 to 1.28), p = N/A                | Very low                    | N/A                                               |
| Muscedere et al, 2011                     | 6              | 0.97 (0.83 to 1.13), p = 0.95               | Moderate                    | 0%; p = 0.81                                      |
| <b>Duration of mechanical ventilation</b> |                |                                             |                             |                                                   |
| Sun et al, 2017                           | 6              | -3.29 days (-4.53 to -2.05),<br>p < 0.00001 | Moderate                    | 62%; p = 0.02                                     |
| Mao et al, 2016                           | 6              | -1.17 days (-2.28 to -0.06),<br>p = 0.006   | Moderate                    | 54%; p = 0.06                                     |
| Caroff et al, 2016                        | 8              | -0.65 days (-1.59 to 0.28),<br>p = 0.17     | Low                         | 67%;<br>p = 0.003                                 |
| Frost et al, 2013                         | 6              | -1.04 days (-2.79 to 0.71),<br>p = N/A      | Very low                    | N/A                                               |
| Leasure et al, 2012                       | 6              | -1.47 days (-2.27 to -0.67),<br>p = 0.0003  | Very low                    | 66%;<br>p = 0.01                                  |
| Wang et al, 2012                          | 5              | -1.55 days (-2.40 to -0.71),<br>p = 0.0003  | Low                         | 71%;<br>p = 0.009                                 |
| Muscedere et al, 2011                     | 7              | -1.08 days (-2.04 to -0.12),<br>p = 0.03    | Moderate                    | 86%;<br>p < 0.00001                               |

**Table S2. Overview of reviews results**

| Author, year published         | Number of RCTs | Effect size (95% CI) <sup>a</sup>         | Quality of evidence (GRADE) | Heterogeneity (I <sup>2</sup> statistic, p value) |
|--------------------------------|----------------|-------------------------------------------|-----------------------------|---------------------------------------------------|
| Dezfulian et al, 2005          | 3              | -1.8 days (-2.1 to -1.5), p = N/A         | Very low                    | N/A;<br>p = 0.004                                 |
| <b>Hospital length of stay</b> |                |                                           |                             |                                                   |
| Sun et al, 2017                | 3              | -4.27 days (-7.36 to -1.18),<br>p = 0.007 | Moderate                    | 45%; p = 0.16                                     |
| Mao et al, 2016                | 3              | -1.44 days (-3.93 to 1.04),<br>p = 0.25   | High                        | 0%; p = 0.99                                      |
| Caroff et al, 2016             | 5              | -0.57 days (-2.44 to 1.30),<br>p = 0.55   | Moderate                    | 0%; p = 0.87                                      |
| Leasure et al, 2012            | 2              | -1.41 days (-3.97 to 1.15),<br>p = 0.28   | Very low                    | 0%; p = 0.98                                      |
| Wang et al, 2012               | 3              | -1.44 days (-3.93 to 1.04),<br>p = 0.25   | Moderate                    | 0%; p = 0.99                                      |
| <b>ICU length of stay</b>      |                |                                           |                             |                                                   |
| Mao et al, 2016                | 4              | -1.64 days (-3.95 to 0.66),<br>p = 0.16   | Moderate                    | 81%;<br>p = 0.001                                 |
| Caroff et al, 2016             | 7              | -1.04 days (-2.40 to 0.33),<br>p = 0.14   | Low                         | 64%; p = 0.01                                     |
| Leasure et al, 2012            | 5              | -1.97 days (-3.91 to -0.02),<br>p = 0.05  | Very low                    | 86%;<br>p < 0.00001                               |
| Wang et al, 2012               | 4              | -2.04 days (-4.18 to 0.09),<br>p = 0.06   | Low                         | 90%;<br>p < 0.00001                               |
| Muscedere et al, 2011          | 7              | -1.52 days (-2.94 to -0.11),<br>p = 0.03  | Low                         | 77%;<br>p = 0.002                                 |
| Dezfulian et al, 2005          | 3              | -1.4 days (-2.1 to -0.08), p = N/A        | Very low                    | N/A;<br>p < 0.001                                 |

**Table S2. Overview of reviews results**

| Author, year published | Number of RCTs | Effect size (95% CI) <sup>a</sup>        | Quality of evidence (GRADE) | Heterogeneity (I <sup>2</sup> statistic, p value) |
|------------------------|----------------|------------------------------------------|-----------------------------|---------------------------------------------------|
| <b>Time to VAP</b>     |                |                                          |                             |                                                   |
| Mao et al, 2016        | 7              | 3.92 days (2.56 to 5.27),<br>p < 0.00001 | Moderate                    | 92%;<br>p < 0.00001                               |
| Frost et al, 2013      | 8              | 2.89 days (0.09 to 5.69),<br>p = N/A     | Very low                    | N/A                                               |
| Leasure et al, 2012    | 7              | 4.04 days (2.60 to 5.47),<br>p < 0.00001 | Very low                    | 93%;<br>p = 0.00001                               |
| Wang et al, 2012       | 8              | 2.66 days (1.06 to 4.26),<br>p = 0.001   | Low                         | 61%;<br>p = 0.01                                  |
| Dezfulian et al, 2005  | 4              | 3.1 days (2.7 to 3.4), p = N/A           | Very low                    | N/A;<br>p < 0.001                                 |

a. Risk ratio (RR) for mortality and incidence of VAP; Mean difference for duration of mechanical ventilation, ICU/hospital length of stay and Time to VAP.

b. Effect size obtained by pooled of VAP caused by nonfermentative bacteria and enterobacteria [OR=0.73 (0.53 to 1.01), p = 0.06; I<sup>2</sup>= 0%, p = 0.99] and VAP caused by Gram-positive cocci and H influenzae organisms; [OR=0.29 (0.18 to 0.48), p < 0.00001; I<sup>2</sup>= 0%, p = 0.48].

N/A, not available
