# Supplementary material for: Subglottic secretion drainage for preventing ventilator-associated pneumonia: an overview of systematic reviews and an updated meta-analysis
Source: PubMed Central journal article supplement — Eur Respir Rev. 2020 Feb 12;29(155):190107. doi: 10.1183/16000617.0107-2019 (PMC9488747; doi:10.1183/16000617.0107-2019), 2020-02-12
Supplement: ERR-0107-2019_table_S3.pdf [file ERR-0107-2019_table_S3.pdf]

**Table S3. GRADE assessment.**

**GRADE evaluation. Outcome: VAP incidence**

**Intervention:** subglottic secretion drainage (SSD)

**Comparison:** not subglottic secretion drainage

| Outcomes  | Anticipated absolute effects* (95% CI) |                                      | Relative effect (95% CI)         | № of participants (studies) | Certainty of the evidence (GRADE) | Comments                                                                                                                           |
|-----------|----------------------------------------|--------------------------------------|----------------------------------|-----------------------------|-----------------------------------|------------------------------------------------------------------------------------------------------------------------------------|
|           | Risk with not SSD                      | Risk with SSD                        |                                  |                             |                                   |                                                                                                                                    |
| Huang     | 156 per 1,000                          | <b>92 per 1,000</b><br>(75 to 117)   | <b>RR 0.59</b><br>(0.48 to 0.75) | 2126<br>(9 RCTs)            | ⊕⊕○○<br>LOW                       | Only two studies had low risk of bias. Results about publication bias were not reported.                                           |
| Sun       | 268 per 1,000                          | <b>145 per 1,000</b><br>(123 to 171) | <b>RR 0.54</b><br>(0.46 to 0.64) | 2052<br>(13 RCTs)           | ⊕⊕⊕○<br>MODERATE                  | GRADE evaluation in the original SRMA.                                                                                             |
| Mao       | 225 per 1,000                          | <b>124 per 1,000</b><br>(108 to 142) | <b>RR 0.55</b><br>(0.48 to 0.63) | 3544<br>(20 RCTs)           | ⊕⊕⊕⊕<br>HIGH                      | GRADE evaluation in the original SRMA.                                                                                             |
| Caroff    | 215 per 1,000                          | <b>125 per 1,000</b><br>(110 to 144) | <b>RR 0.58</b><br>(0.51 to 0.67) | 3369<br>(17 RCTs)           | ⊕⊕⊕○<br>MODERATE                  | Only five studies had low risk of bias.                                                                                            |
| Frost     | 173 per 1,000                          | <b>90 per 1,000</b><br>(72 to 112)   | <b>RR 0.52</b><br>(0.42 to 0.65) | 2277<br>(9 RCTs)            | ⊕○○○<br>VERY LOW                  | I2 value to assess heterogeneity not reported. Risk of bias of included studies not evaluated.                                     |
| Leasure   | 249 per 1,000                          | <b>129 per 1,000</b><br>(107 to 159) | <b>RR 0.52</b><br>(0.43 to 0.64) | 1709<br>(10 RCTs)           | ⊕○○○<br>VERY LOW                  | Results about risk of bias of included studies not reported. Publication bias was not evaluated.                                   |
| Wang      | 172 per 1,000                          | <b>97 per 1,000</b><br>(78 to 119)   | <b>RR 0.56</b><br>(0.45 to 0.69) | 2105<br>(10 RCTs)           | ⊕⊕⊕○<br>MODERATE                  | Only two studies had low risk of bias.                                                                                             |
| Muscedere | 210 per 1,000                          | <b>115 per 1,000</b><br>(96 to 138)  | <b>RR 0.55</b><br>(0.46 to 0.66) | 2442<br>(13 RCTs)           | ⊕⊕⊕○<br>MODERATE                  | Only four studies had low risk of bias.                                                                                            |
| Dezfulian | 191 per 1,000                          | <b>97 per 1,000</b><br>(71 to 136)   | <b>RR 0.51</b><br>(0.37 to 0.71) | 896<br>(5 RCTs)             | ⊕○○○<br>VERY LOW                  | All included studies had moderate risk of bias. I2 value to assess heterogeneity not reported. Publication bias was not evaluated. |

**Table S3. GRADE assessment.**

**GRADE evaluation. Outcome: VAP incidence**

**Intervention:** subglottic secretion drainage (SSD)

**Comparison:** not subglottic secretion drainage

| Outcomes | Anticipated absolute effects* (95% CI) |               | Relative effect (95% CI) | № of participants (studies) | Certainty of the evidence (GRADE) | Comments |
|----------|----------------------------------------|---------------|--------------------------|-----------------------------|-----------------------------------|----------|
|          | Risk with not SSD                      | Risk with SSD |                          |                             |                                   |          |

\*The risk in the intervention group (and its 95% confidence interval) is based on the assumed risk in the comparison group and the **relative effect** of the intervention (and its 95% CI).

CI: Confidence interval; RR: Risk ratio; SSD: subglottic secretion drainage; VAP: Ventilator associated pneumonia; SRMA: Systematic review with meta-analysis.

**GRADE Working Group grades of evidence**

**High certainty:** We are very confident that the true effect lies close to that of the estimate of the effect

**Moderate certainty:** We are moderately confident in the effect estimate: The true effect is likely to be close to the estimate of the effect, but there is a possibility that it is substantially different

**Low certainty:** Our confidence in the effect estimate is limited: The true effect may be substantially different from the estimate of the effect

**Very low certainty:** We have very little confidence in the effect estimate: The true effect is likely to be substantially different from the estimate of effect

## GRADE evaluation. Outcome: Mortality

**Intervention:** subglottic secretion drainage (SSD)

**Comparison:** not subglottic secretion drainage

| Outcomes             | Anticipated absolute effects* (95% CI) |                                      | Relative effect (95% CI)         | № of participants (studies) | Certainty of the evidence (GRADE) | Comments                                                                                       |
|----------------------|----------------------------------------|--------------------------------------|----------------------------------|-----------------------------|-----------------------------------|------------------------------------------------------------------------------------------------|
|                      | Risk with not SSD                      | Risk with SSD                        |                                  |                             |                                   |                                                                                                |
| Sun                  | 177 per 1,000                          | <b>158 per 1,000</b><br>(129 to 193) | <b>RR 0.89</b><br>(0.73 to 1.09) | 1546<br>(7 RCTs)            | ⊕⊕⊕○<br>MODERATE                  | GRADE evaluation in the original SRMA.                                                         |
| Mao (ICU)            | 244 per 1,000                          | <b>239 per 1,000</b><br>(208 to 276) | <b>RR 0.98</b><br>(0.85 to 1.13) | 2291<br>(8 RCTs)            | ⊕⊕⊕⊕<br>HIGH                      | GRADE evaluation in the original SRMA.                                                         |
| Mao (hospital)       | 291 per 1,000                          | <b>268 per 1,000</b><br>(233 to 306) | <b>RR 0.92</b><br>(0.80 to 1.05) | 1607<br>(7 RCTs)            | ⊕⊕⊕⊕<br>HIGH                      | GRADE evaluation in the original SRMA.                                                         |
| Caroff               | 252 per 1,000                          | <b>234 per 1,000</b><br>(212 to 260) | <b>RR 0.93</b><br>(0.84 to 1.03) | 3232<br>(14 RCTs)           | ⊕⊕⊕○<br>MODERATE                  | Only five studies had low risk of bias.                                                        |
| Frost (ICU)          | 309 per 1,000                          | <b>325 per 1,000</b><br>(266 to 396) | <b>RR 1.05</b><br>(0.86 to 1.28) | 781<br>(4 RCTs)             | ⊕○○○<br>VERY LOW                  | I2 value to assess heterogeneity not reported. Risk of bias of included studies not evaluated. |
| Frost (hospital)     | 206 per 1,000                          | <b>197 per 1,000</b><br>(166 to 230) | <b>RR 0.96</b><br>(0.81 to 1.12) | 1481<br>(4 RCTs)            | ⊕○○○<br>VERY LOW                  | I2 value to assess heterogeneity not reported. Risk of bias of included studies not evaluated. |
| Leasure              | 290 per 1,000                          | <b>264 per 1,000</b><br>(232 to 304) | <b>RR 0.91</b><br>(0.80 to 1.05) | 1641<br>(9 RCTs)            | ⊕○○○<br>VERY LOW                  | Risk of bias of included studies not evaluated. Publication bias was not evaluated.            |
| Wang                 | 221 per 1,000                          | <b>215 per 1,000</b><br>(186 to 248) | <b>RR 0.97</b><br>(0.84 to 1.12) | 2125<br>(9 RCTs)            | ⊕⊕⊕○<br>MODERATE                  | Only two studies had low risk of bias.                                                         |
| Muscedere (ICU)      | 208 per 1,000                          | <b>210 per 1,000</b><br>(177 to 250) | <b>RR 1.01</b><br>(0.85 to 1.20) | 1662<br>(6 RCTs)            | ⊕⊕⊕○<br>MODERATE                  | Only three studies had low risk of bias.                                                       |
| Muscedere (hospital) | 201 per 1,000                          | <b>195 per 1,000</b><br>(167 to 228) | <b>RR 0.97</b><br>(0.83 to 1.13) | 1682<br>(6 RCTs)            | ⊕⊕⊕○<br>MODERATE                  | Only three studies had low risk of bias.                                                       |

## GRADE evaluation. Outcome: Mortality

**Intervention:** subglottic secretion drainage (SSD)

**Comparison:** not subglottic secretion drainage

| Outcomes  | Anticipated absolute effects* (95% CI) |                                      | Relative effect (95% CI)      | № of participants (studies) | Certainty of the evidence (GRADE) | Comments                                                                                                                           |
|-----------|----------------------------------------|--------------------------------------|-------------------------------|-----------------------------|-----------------------------------|------------------------------------------------------------------------------------------------------------------------------------|
|           | Risk with not SSD                      | Risk with SSD                        |                               |                             |                                   |                                                                                                                                    |
| Dezfulian | 163 per 1,000                          | <b>179 per 1,000</b><br>(130 to 228) | <b>RR 1.1</b><br>(0.8 to 1.4) | 823<br>(4 RCTs)             | ⊕○○○<br>VERY LOW                  | All included studies had moderate risk of bias. I2 value to assess heterogeneity not reported. Publication bias was not evaluated. |

\*The risk in the intervention group (and its 95% confidence interval) is based on the assumed risk in the comparison group and the **relative effect** of the intervention (and its 95% CI).

**CI:** Confidence interval; **RR:** Risk ratio; **SRMA:** Systematic review with meta-analysis; **SSD:** Subglottic secretion drainage.

### GRADE Working Group grades of evidence

**High certainty:** We are very confident that the true effect lies close to that of the estimate of the effect

**Moderate certainty:** We are moderately confident in the effect estimate: The true effect is likely to be close to the estimate of the effect, but there is a possibility that it is substantially different

**Low certainty:** Our confidence in the effect estimate is limited: The true effect may be substantially different from the estimate of the effect

**Very low certainty:** We have very little confidence in the effect estimate: The true effect is likely to be substantially different from the estimate of effect

## GRADE evaluation. Outcome: Duration of Mechanical Ventilation

**Intervention:** subglottic secretion drainage (SSD)

**Comparison:** not subglottic secretion drainage

| Outcomes  | Relative effect (95% CI)<br>Risk with SSD                                         | Nº of participants (studies) | Certainty of the evidence (GRADE) | Comments                                                                   |
|-----------|-----------------------------------------------------------------------------------|------------------------------|-----------------------------------|----------------------------------------------------------------------------|
| Sun       | The mean in the intervention group was 3.29 days fewer (4.53 fewer to 2.05 fewer) | 695 (6 RCTs)                 | ⊕⊕⊕○<br>MODERATE                  | GRADE evaluation in the original SRMA.                                     |
| Mao       | The mean in the intervention group was 1.17 days fewer (2.28 fewer to 0.06 fewer) | 998 (6 RCTs)                 | ⊕⊕⊕○<br>MODERATE                  | GRADE evaluation in the original SRMA.                                     |
| Caroff    | The mean in the intervention group was 0.65 days fewer (1.59 fewer to 0.28 more)  | 2331 (8 RCTs)                | ⊕⊕○○<br>LOW                       | I2 value greater than 50%. Only five studies had low risk of bias.         |
| Frost     | The mean in the intervention group was 1.04 days fewer (2.79 fewer to 0.71 more)  | 1973 (6 RCTs)                | ⊕○○○<br>VERY LOW                  | Risk of bias not evaluated. I2 value to assess heterogeneity not reported. |
| Leasure   | The mean in the intervention group was 1.47 days fewer (2.27 fewer to 0.67 fewer) | 1078 (6 RCTs)                | ⊕○○○<br>VERY LOW                  | Risk of bias not evaluated. Publication bias not evaluated.                |
| Wang      | The mean in the intervention group was 1.55 days fewer (2.4 fewer to 0.71 fewer)  | 852 (5 RCTs)                 | ⊕⊕○○<br>LOW                       | I2 value greater than 50%. Only one included study had low risk of bias.   |
| Muscedere | The mean in the intervention group was 1.08 days fewer (2.04 fewer to 0.12 fewer) | 2010 (7 RCTs)                | ⊕⊕⊕○<br>MODERATE                  | Only four studies had low risk of bias.                                    |

---

## GRADE evaluation. Outcome: Duration of Mechanical Ventilation

---

**Intervention:** subglottic secretion drainage (SSD)

**Comparison:** not subglottic secretion drainage

| Outcomes  | Relative effect (95% CI)<br>Risk with SSD                                      | N <sup>o</sup> of participants (studies) | Certainty of the evidence (GRADE) | Comments                                                                                                                          |
|-----------|--------------------------------------------------------------------------------|------------------------------------------|-----------------------------------|-----------------------------------------------------------------------------------------------------------------------------------|
| Dezfulian | The mean in the intervention group was 1.8 days fewer (2.1 fewer to 1.5 fewer) | 683 (3 RCTs)                             | ⊕○○○<br>VERY LOW                  | All included studies had moderate risk of bias. I2 value to assess heterogeneity not reported. Publication bias was not assessed. |

---

**CI:** Confidence interval; **SRMA:** Systematic review with meta-analysis; **SSD:** Subglottic secretion drainage.

### GRADE Working Group grades of evidence

**High certainty:** We are very confident that the true effect lies close to that of the estimate of the effect

**Moderate certainty:** We are moderately confident in the effect estimate: The true effect is likely to be close to the estimate of the effect, but there is a possibility that it is substantially different

**Low certainty:** Our confidence in the effect estimate is limited: The true effect may be substantially different from the estimate of the effect

**Very low certainty:** We have very little confidence in the effect estimate: The true effect is likely to be substantially different from the estimate of effect

---

## GRADE evaluation. Outcome: Length of stay (ICU/hospital)

**Intervention:** Subglottic secretion drainage (SSD)

**Comparison:** not SSD

| Outcomes           | Anticipated absolute effects* (95% CI)<br><br>Mean difference (MD) with SSD                                      | Nº of participants<br>(studies) | Certainty of<br>the evidence<br>(GRADE) | Comments                                                                                |
|--------------------|------------------------------------------------------------------------------------------------------------------|---------------------------------|-----------------------------------------|-----------------------------------------------------------------------------------------|
| Sun (hospital)     | The mean of length of ICU/hospital stay in the intervention group was 4,27 days fewer (7,36 fewer to 1,18 fewer) | 251<br>(3 RCTs)                 | ⊕⊕⊕○<br>MODERATE                        | GRADE evaluation in the original SRMA.                                                  |
| Mao (hospital)     | The mean of length of ICU/hospital stay in the intervention group was 1,44 days fewer (3,93 fewer to 1,04 more)  | 591<br>(3 RCTs)                 | ⊕⊕⊕⊕<br>HIGH                            | GRADE evaluation in the original SRMA.                                                  |
| Mao (ICU)          | The mean of length of ICU/hospital stay in the intervention group was 1,64 days fewer (3,95 fewer to 0,66 more)  | 932<br>(4 RCTs)                 | ⊕⊕⊕○<br>MODERATE                        | GRADE evaluation in the original SRMA.                                                  |
| Caroff (ICU)       | The mean of length of ICU/hospital stay in the intervention group was 1,04 days fewer (2,4 fewer to 0,33 more)   | 2233<br>(7 RCTs)                | ⊕⊕○○<br>LOW                             | Only five studies had low risk of bias. I2 value greater than 50%.                      |
| Caroff (hospital)  | The mean of length of ICU/hospital stay in the intervention group was 0,57 days fewer (2,44 fewer to 1,3 more)   | 1657<br>(5 RCTs)                | ⊕⊕⊕○<br>MODERATE                        | Only three studies had low risk of bias                                                 |
| Leasure (hospital) | The mean of length of ICU/hospital stay in the intervention group was 1,41 days fewer (3,97 fewer to 1,15 more)  | 493<br>(2 RCTs)                 | ⊕○○○<br>VERY LOW                        | Risk of bias of included studies was not evaluated. Publication bias was not evaluated. |
| Leasure (ICU)      | The mean of length of ICU/hospital stay in the intervention group was 1,97 days fewer (3,91 fewer to 0,02 fewer) | 987<br>(5 RCTs)                 | ⊕○○○<br>VERY LOW                        | Risk of bias of included studies was not evaluated. Publication bias was not evaluated. |
| Wang (hospital)    | The mean of length of ICU/hospital stay in the intervention group was 1,44 days fewer (3,93 fewer to 1,04 more)  | 591<br>(3 RCTs)                 | ⊕⊕⊕○<br>MODERATE                        | Only one study had low risk of bias.                                                    |
| Wang (ICU)         | The mean of length of ICU/hospital stay in the intervention group was 2,04 days fewer (4,18 fewer to 0,09 more)  | 744<br>(4 RCTs)                 | ⊕⊕○○<br>LOW                             | I2 value greater than 50%. Only one study had low risk of bias.                         |

---

## GRADE evaluation. Outcome: Length of stay (ICU/hospital)

---

**Intervention:** Subglottic secretion drainage (SSD)

**Comparison:** not SSD

| Outcomes        | Anticipated absolute effects* (95% CI)<br><br>Mean difference (MD) with SSD                                      | Nº of participants<br>(studies) | Certainty of<br>the evidence<br>(GRADE) | Comments                                                                                                                             |
|-----------------|------------------------------------------------------------------------------------------------------------------|---------------------------------|-----------------------------------------|--------------------------------------------------------------------------------------------------------------------------------------|
| Muscedere (ICU) | The mean of length of ICU/hospital stay in the intervention group was 1,52 days fewer (2,94 fewer to 0,11 fewer) | 2010<br>(7 RCTs)                | ⊕⊕○○<br>LOW                             | I2 value greater than 50%. Only four studies had low risk of bias                                                                    |
| Dezfulian (ICU) | The mean of length of ICU/hospital stay in the intervention group was 1,4 days fewer (0,8 more to 2,1 more)      | 683<br>(3 RCTs)                 | ⊕○○○<br>VERY LOW                        | Publication bias was not evaluated. All included studies had a moderate risk of bias. I2 value to assess heterogeneity not reported. |

---

CI: Confidence interval; SRMA: Systematic review with meta-analysis; SSD: Subglottic secretion drainage; ICU: Intensive Care Unit

---

### GRADE Working Group grades of evidence

**High certainty:** We are very confident that the true effect lies close to that of the estimate of the effect

**Moderate certainty:** We are moderately confident in the effect estimate: The true effect is likely to be close to the estimate of the effect, but there is a possibility that it is substantially different

**Low certainty:** Our confidence in the effect estimate is limited: The true effect may be substantially different from the estimate of the effect

**Very low certainty:** We have very little confidence in the effect estimate: The true effect is likely to be substantially different from the estimate of effect

---



## GRADE evaluation. Outcome: Time to VAP

**Intervention:** Subglottic secretion drainage (SSD)

**Comparison:** not SSD

| Outcomes  | Anticipated absolute effects* (95% CI)<br>Mean difference (MD) with SSD                             | Nº of participants<br>(studies) | Certainty of<br>the evidence<br>(GRADE) | Comments                                                                                                                             |
|-----------|-----------------------------------------------------------------------------------------------------|---------------------------------|-----------------------------------------|--------------------------------------------------------------------------------------------------------------------------------------|
| Mao       | The mean of days to onset VAP in the intervention group was 3.92 days more (2.56 more to 5.27 more) | 959<br>(7 RCTs)                 | ⊕⊕⊕○<br>MODERATE                        | GRADE evaluation in the original SRMA.                                                                                               |
| Frost     | The mean of days to onset VAP in the intervention group was 2.89 days more (0.09 more to 5.69 more) | 2127<br>(8 RCTs)                | ⊕○○○<br>VERY LOW                        | Risk of bias not evaluated. I2 value to assess heterogeneity not reported                                                            |
| Leasure   | The mean of days to onset VAP in the intervention group was 4.04 days more (2.6 more to 5.47 more)  | 1141<br>(7 RCTs)                | ⊕○○○<br>VERY LOW                        | Risk of bias of included studies was not evaluated. Publication bias was not evaluated. I2 value >50%                                |
| Wang      | The mean of days to onset VAP in the intervention group was 2.66 days more (1.06 more to 4.26 more) | 1016<br>(8 RCTs)                | ⊕⊕○○<br>LOW                             | Only two studies had low risk of bias. I2 value >50%                                                                                 |
| Dezfulian | The mean of days to onset VAP in the intervention group was 3.1 days more (2.7 more to 3.4 more)    | 746<br>(4 RCTs)                 | ⊕○○○<br>VERY LOW                        | Publication bias was not evaluated. All included studies had a moderate risk of bias. I2 value to assess heterogeneity not reported. |

**CI:** Confidence interval; **SRMA:** Systematic review with meta-analysis; **SSD:** Subglottic secretion drainage; **VAP:** Ventilator-associated pneumonia.

### GRADE Working Group grades of evidence

**High certainty:** We are very confident that the true effect lies close to that of the estimate of the effect

**Moderate certainty:** We are moderately confident in the effect estimate: The true effect is likely to be close to the estimate of the effect, but there is a possibility that it is substantially different

**Low certainty:** Our confidence in the effect estimate is limited: The true effect may be substantially different from the estimate of the effect

**Very low certainty:** We have very little confidence in the effect estimate: The true effect is likely to be substantially different from the estimate of effect
