# Supplementary material for: Subglottic secretion drainage for preventing ventilator-associated pneumonia: an overview of systematic reviews and an updated meta-analysis
Source: PubMed Central journal article supplement — Eur Respir Rev. 2020 Feb 12;29(155):190107. doi: 10.1183/16000617.0107-2019 (PMC9488747; doi:10.1183/16000617.0107-2019), 2020-02-12
Supplement: ERR-0107-2019_table_S4.pdf [file ERR-0107-2019_table_S4.pdf]

**Table S4. AMSTAR-2 quality assessment**

| AMSTAR item                                                   | Author     |             |          |             |             |              |                |             |                |
|---------------------------------------------------------------|------------|-------------|----------|-------------|-------------|--------------|----------------|-------------|----------------|
|                                                               | Huang 2018 | Sun 2017    | Mao 2016 | Caroff 2016 | Frost 2013  | Leasure 2012 | Muscedere 2011 | Wang 2011   | Dezfulian 2005 |
| <b>1. PICO components described?</b>                          | Yes        | Yes         | Yes      | Yes         | Yes         | Yes          | Yes            | Yes         | Yes            |
| <b>2. A statement design provided?</b>                        | No         | No          | Yes      | No          | No          | No           | No             | No          | No             |
| <b>3. Selection of included studies designs explained?</b>    | Yes        | Yes         | Yes      | Yes         | Yes         | No           | Yes            | Yes         | Yes            |
| <b>4. Comprehensive literature search performed?</b>          | Yes        | Yes         | Yes      | Yes         | Yes         | Yes          | Yes            | Yes         | Yes            |
| <b>5. Duplicate study selection performed?</b>                | Yes        | Yes         | Yes      | No          | No          | Yes          | Yes            | No          | Yes            |
| <b>6. Duplicate data extraction performed?</b>                | Yes        | Yes         | Yes      | Yes         | No          | Yes          | Yes            | Yes         | Yes            |
| <b>7. List of excluded studies provided?</b>                  | No         | No          | No       | Yes         | No          | Yes          | Yes            | No          | No             |
| <b>8. Details of the included studies provided?</b>           | Yes        | Partial Yes | Yes      | Yes         | Partial Yes | Yes          | Yes            | Partial Yes | Partial Yes    |
| <b>9. RoB of individual studies assessed?</b>                 | Yes        | Yes         | Yes      | Yes         | No          | No           | Partial Yes    | Yes         | Partial Yes    |
| <b>10. Sources of funding for studies included reported?</b>  | No         | No          | No       | No          | No          | No           | No             | No          | No             |
| <b>11. Methods for statistical analysis appropriated?</b>     | Yes        | Yes         | Yes      | Yes         | Yes         | Yes          | Yes            | Yes         | Yes            |
| <b>12. Impact of RoB on meta-analysis assessed?</b>           | No         | Yes         | Yes      | Yes         | No          | No           | Yes            | Yes         | No             |
| <b>13. RoB of individual studies in discussion accounted?</b> | No         | No          | Yes      | Yes         | No          | No           | No             | Yes         | Yes            |

**Table S4. AMSTAR-2 quality assessment**

| AMSTAR item                                          | Author     |          |          |             |            |              |                |           |                |  |
|------------------------------------------------------|------------|----------|----------|-------------|------------|--------------|----------------|-----------|----------------|--|
|                                                      | Huang 2018 | Sun 2017 | Mao 2016 | Caroff 2016 | Frost 2013 | Leasure 2012 | Muscedere 2011 | Wang 2011 | Dezfulian 2005 |  |
| <b>14. Explanation for heterogeneity?</b>            | Yes        | Yes      | Yes      | Yes         | Yes        | No           | Yes            | Yes       | Yes            |  |
| <b>15. Likelihood of publication bias assessed?</b>  | No         | Yes      | Yes      | Yes         | Yes        | No           | Yes            | Yes       | No             |  |
| <b>16. Sources of conflict of interest reported?</b> | Yes        | Yes      | Yes      | Yes         | No         | Yes          | Yes            | Yes       | Yes            |  |

RoB, risk of bias
