# Supplementary material for: Subglottic secretion drainage for preventing ventilator-associated pneumonia: an overview of systematic reviews and an updated meta-analysis
Source: PubMed Central journal article supplement — Eur Respir Rev. 2020 Feb 12;29(155):190107. doi: 10.1183/16000617.0107-2019 (PMC9488747; doi:10.1183/16000617.0107-2019), 2020-02-12
Supplement: ERR-0107-2019_table_S5.pdf [file ERR-0107-2019_table_S5.pdf]

**Table S5. Studies included in the systematic reviews with meta-analysis**

| Study                   | n   | Characteristic of ICU/ patients                                                                                                                                                                      | Diagnosis of VAP                                                                                                                      | Inclusion criteria                                                                                                      | Exclusion criteria                                                                                                                                                                                                                                                                                                               | Intervention (I) and Control (C) groups                                                                                                                                                                                                                                                       | Cointerventions <sup>a</sup> and VAP Bundle <sup>b</sup>                                                                                                                                                                                                                                                                                                                           |
|-------------------------|-----|------------------------------------------------------------------------------------------------------------------------------------------------------------------------------------------------------|---------------------------------------------------------------------------------------------------------------------------------------|-------------------------------------------------------------------------------------------------------------------------|----------------------------------------------------------------------------------------------------------------------------------------------------------------------------------------------------------------------------------------------------------------------------------------------------------------------------------|-----------------------------------------------------------------------------------------------------------------------------------------------------------------------------------------------------------------------------------------------------------------------------------------------|------------------------------------------------------------------------------------------------------------------------------------------------------------------------------------------------------------------------------------------------------------------------------------------------------------------------------------------------------------------------------------|
| Mahmoodpoor et al, 2017 | 276 | <p>Surgical ICU</p> <p>(I):<br/>APACHE II: 22.6 ± 5.1<br/>ICU LOS: 15 ± 5<br/>Duration MV: 11.6 ± 7.1</p> <p>(C):<br/>APACHE II: 21.4 ± 4.4<br/>ICU LOS: 18 ± 10<br/>Duration MV: 12.3 ± 10.5</p>    | MV>48h, clinical features (CPIS) and bacterial pathogens ≥10 <sup>4</sup> CFU/ml in quantitative culture from bronchoalveolar lavage. | Age between 18 and 80 yr requiring mechanical ventilation for more than 72 hours with placement of an endotracheal tube | Patients transferred from other hospitals, urgent intubation in wards other than ICU, history of MV, pregnancy, HIV, immunosuppression, leukopenia, patient refusal, and acute respiratory distress syndrome. Patients who were receiving antibiotics at the time of intubation, and those who need a PEEP>5cm H <sup>2</sup> O. | <p>(I):<br/>TaperGuard EVAC™ tubes: equipped with SSD port, polyurethane and cone shape cuff.<br/>Method of SSD: Intermittent every 6h</p> <p>(C):<br/>Conventional high-volume low-pressure endotracheal tubes</p>                                                                           | <p>Cointervention: Polyurethane-cone shape cuff</p> <p>VAP bundle:</p> <ul style="list-style-type: none"> <li>- Head elevation of 45°.</li> <li>- Protocolized enteral feeding.</li> <li>- Sedation with washout periods.</li> <li>- Oral hygiene with chlorhexidine.</li> <li>- Hand washing.</li> <li>- Pantoprazol for stress ulcer prophylaxis.</li> </ul>                     |
| Deem et al, 2016        | 66  | <p>ICUs at Harborview Medical Center.</p> <p>(I):<br/>SAPS II: 60 ± 12<br/>ICU LOS: N/A<br/>Duration MV: 6.5 ± 12.7</p> <p>(C):<br/>SAPS II: 60 ± 14<br/>ICU LOS: N/A<br/>Duration MV: 4.5 ± 4.3</p> | Modified Criteria of CDC                                                                                                              | Adults (>18 yr of age) requiring emergency orotracheal intubation and critical care.                                    | <p>Patients with out-of-hospital cardiac arrest.</p> <p>Use of a non-study-designated intubation device.</p> <p>Nasal intubation or tracheostomy.</p> <p>Children (age &lt; 18 yr), pregnant women, and prisoners.</p>                                                                                                           | <p>(I):</p> <ol style="list-style-type: none"> <li>1) a polyurethane-conical shaped cuffed tube</li> <li>2) a polyurethane- conical shaped cuffed tube with a port for SSD</li> </ol> <p>Method of SSD:<br/>Continuous</p> <p>(C):<br/>Standard polyvinylchloride-cylindrical cuffed tube</p> | <p>Cointervention: Polyurethane-cuffed</p> <p>VAP bundle:</p> <ul style="list-style-type: none"> <li>- Head elevation of 45°.</li> <li>- Protocolized enteral feeding.</li> <li>- Oral care every 8h with 0.12% chlorhexidine.</li> <li>- Hand washing.</li> <li>- Stress ulcer prophylaxis.</li> <li>- Endotracheal tube cuff pressure measured and adjusted every 8h.</li> </ul> |

**Table S5. Studies included in the systematic reviews with meta-analysis**

| Study             | n   | Characteristic of ICU/ patients                                                                                                                                                            | Diagnosis of VAP                                                                                   | Inclusion criteria                                                                                            | Exclusion criteria                                                                                                                                                                    | Intervention (I) and Control (C) groups                                                                                                                               | Cointerventions <sup>a</sup> and VAP Bundle <sup>b</sup>                                                                                                                                                                                                                                                                                                                          |
|-------------------|-----|--------------------------------------------------------------------------------------------------------------------------------------------------------------------------------------------|----------------------------------------------------------------------------------------------------|---------------------------------------------------------------------------------------------------------------|---------------------------------------------------------------------------------------------------------------------------------------------------------------------------------------|-----------------------------------------------------------------------------------------------------------------------------------------------------------------------|-----------------------------------------------------------------------------------------------------------------------------------------------------------------------------------------------------------------------------------------------------------------------------------------------------------------------------------------------------------------------------------|
| Jena et al, 2016  | 50  | Neurological ICU<br>(I):<br>APACHE/SAPS II: N/A<br>ICU LOS: 29.8 ± 20.1<br>Duration MV: 21.5 ± 17.6<br><br>(C):<br>APACHE/SAPS II: N/A<br>ICU LOS: 24.4 ± 14.2<br>Duration MV: 17.2 ± 11.5 | MV>48h, clinical features and microbiological confirmation of VAP by bronchoalveolar lavage fluid. | Patients with neurological illnesses aged > 18 years and requiring endotracheal intubation and VM > 48 h were | Patients who arrived to ICU already intubated or reintubated during the study period, patients with a tracheostomy, and patients intubated for cardiac arrest or ventilated for <48 h | (I):<br>Portex Blue Line endotracheal tube (suction above cuff endotracheal tube).<br>Method of SSD: Intermittent every 2h.<br><br>(C):<br>Standard endotracheal tube | Cointervention: None specified<br><br>VAP bundle:<br>- Oral intubation.<br>- Use of nasogastric tubes.<br>- Early enteral nutrition.<br>- Semi-recumbent position.<br>- Stress ulcer prophylaxis.<br>- Maintenance of cuff pressure between 20-30 cm H <sup>2</sup> O.                                                                                                            |
| Gopal et al, 2015 | 240 | Cardiothoracic surgery ICU<br>(I):<br>EuroSCORE: 6.4 ± 2.2<br>ICU LOS: N/A<br>Duration MV: N/A<br><br>(C):<br>EuroSCORE: 6.4 ± 2.6<br>ICU LOS: N/A<br>Duration MV: N/A                     | Hospital in Europe Link for Infection Surveillance (HELICS)                                        | Age over 70 years and/ or left ventricular ejection function <50% and urgent cardiac surgery.                 | N/A                                                                                                                                                                                   | (I):<br>Venner-PneuX™ endotracheal tube.<br>Method of SSD: N/A<br><br>(C):<br>Standard endotracheal tube (Portex tracheal tube) Intermittent every 6h                 | Cointervention: Tracheal seal monitor that allow continuous cuff inflation pressures monitorization and maintenance.<br><br>VAP bundle:<br>- Semi-recumbent position.<br>- Change of ventilator circuits when soiled or at 7 days.<br>- Mouthwash every 6h with 2% chlorhexidine.<br>- Appropriate hand hygiene.<br>- Stress ulcer prophylaxis with ranitidine 50mg I.V every 8h. |

**Table S5. Studies included in the systematic reviews with meta-analysis**

| Study             | n   | Characteristic of ICU/ patients                                                                                                                                                                           | Diagnosis of VAP                                                                                           | Inclusion criteria                                                      | Exclusion criteria                                                                   | Intervention (I) and Control (C) groups                                                                                                                 | Cointerventions <sup>a</sup> and VAP Bundle <sup>b</sup>                                                                                                                                                                                                                                               |
|-------------------|-----|-----------------------------------------------------------------------------------------------------------------------------------------------------------------------------------------------------------|------------------------------------------------------------------------------------------------------------|-------------------------------------------------------------------------|--------------------------------------------------------------------------------------|---------------------------------------------------------------------------------------------------------------------------------------------------------|--------------------------------------------------------------------------------------------------------------------------------------------------------------------------------------------------------------------------------------------------------------------------------------------------------|
| Damas et al, 2015 | 352 | 5 ICUs in a tertiary hospital<br><br>I):<br>SAPS III: 70 ± 14.5<br>ICU LOS: 16.2 ± 13.5<br>Duration MV: 11.7 ± 11.9<br><br>(C):<br>SAPS III: 69 ± 16.6<br>ICU LOS: 15.8 ± 13.2<br>Duration MV: 10.9 ± 9.8 | Clinical features and quantitative bacterial culture ≥ 10 <sup>6</sup> CFU/ml from bronchoalveolar lavage. | Expected MV>48h, age over 18 years and intubation with a Teleflex Isis™ | Patient participating in another study or having already participated in this study. | (I):<br>Teleflex Isis™ endotracheal tube that allow the SSD<br>Method of SSD: N/A<br><br>(C):<br>Teleflex Isis™ endotracheal tube without SSD technique | Cointervention: None specified<br><br>VAP bundle:<br>- Semi-recumbent position of at least 30°.<br>- Oral care and teeth brushing with 0.2% chlorhexidine and application of 1% chlorhexidine gel.<br>- Daily assessment of sedation.<br>- Control of cuff pressure between 20-30 cm H <sup>2</sup> O. |
| Tao et al, 2014   | 149 | N/A<br><br>I):<br>SAPS III: N/A<br>ICU LOS: N/A<br>Duration MV: N/A<br><br>(C):<br>SAPS III: N/A<br>ICU LOS: N/A<br>Duration MV: N/A                                                                      | MV>48h, clinical features and culture of endotracheal aspirate, reduction of oxygen.                       | Expected MV>48h and APACHE score 20-30                                  | Lung infection when MV beginning                                                     | (I):<br>1) Intermittent SSD every 4h<br>2) Continuous SSD<br><br>(C):<br>Not SSD                                                                        | Cointervention: None specified                                                                                                                                                                                                                                                                         |

**Table S5. Studies included in the systematic reviews with meta-analysis**

| Study                 | n   | Characteristic of ICU/ patients                                                                                                                                                                                                                                         | Diagnosis of VAP                                                                                                                                                                           | Inclusion criteria                                                     | Exclusion criteria                                                                                                                                    | Intervention (I) and Control (C) groups                                                                                                                                                   | Cointerventions <sup>a</sup> and VAP Bundle <sup>b</sup>                                                                                                                                                                                                                 |
|-----------------------|-----|-------------------------------------------------------------------------------------------------------------------------------------------------------------------------------------------------------------------------------------------------------------------------|--------------------------------------------------------------------------------------------------------------------------------------------------------------------------------------------|------------------------------------------------------------------------|-------------------------------------------------------------------------------------------------------------------------------------------------------|-------------------------------------------------------------------------------------------------------------------------------------------------------------------------------------------|--------------------------------------------------------------------------------------------------------------------------------------------------------------------------------------------------------------------------------------------------------------------------|
| Seyfi et al, 2013     | 80  | ICU of Hospital of Tehran<br><br>I):<br>SAPS/APACHE: N/A<br>ICU LOS: N/A<br>Duration MV: N/A<br><br>(C):<br>SAPS/APACHE: N/A<br>ICU LOS: N/A<br>Duration MV: N/A                                                                                                        | Clinical features (CPIS)                                                                                                                                                                   | N/A                                                                    | N/A                                                                                                                                                   | (I):<br>Special tracheal tube for SSD<br>Method of SSD: Intermittent every 1-2h<br><br>(C):<br>Ordinary tracheal tube                                                                     | Cointervention: N/A<br><br>VAP bundle: N/A                                                                                                                                                                                                                               |
| Lacherade et al, 2010 | 333 | Medical-surgical ICU<br><br>I):<br>SAPS III: 51 [40–64] <sup>c</sup><br>ICU LOS: 11 [7–19] <sup>c</sup><br>Duration MV: 8 [5–13] <sup>c</sup><br><br>(C):<br>SAPS III: 52 [39–63] <sup>c</sup><br>ICU LOS: 11 [6–20] <sup>c</sup><br>Duration MV: 7 [3–15] <sup>c</sup> | Clinical features and quantitative bacterial culture $\geq 10^4$ CFU/ml from bronchoalveolar lavage or quantitative culture $\geq 10^3$ CFU/ml from protected telescoping catheter sample. | Expected MV > 48h, older than 18 years, intubated with HI-Lo Evac tube | Intubated before ICU and/ or with a tube different than HI-Lo Evac tube, tracheostomy, physhotropic drug overdose, acute drunkenness, cardiac arrest. | (I):<br>Specific tracheal tube for SSD (HI-Lo Evac tube)<br>Method of SSD: Intermittent every 1h.<br><br>(C):<br>Conventional tracheal tube and/or HI-Lo Evac tube without SSD technique. | Cointervention: none specified.<br><br>VAP bundle:<br>- Semi-recumbent body position.<br>- Oral route of insertion of the tracheal and gastric tubes.<br>- Enteral delivery of nutritional support.<br>- Maintenance of cuff pressure between 20-30 cm H <sup>2</sup> O. |

**Table S5. Studies included in the systematic reviews with meta-analysis**

| Study             | n  | Characteristic of ICU/ patients                                                                                                                                                                 | Diagnosis of VAP                                                                                   | Inclusion criteria                    | Exclusion criteria   | Intervention (I) and Control (C) groups                                                                  | Cointerventions <sup>a</sup> and VAP Bundle <sup>b</sup>                                                                                                                                                                                              |
|-------------------|----|-------------------------------------------------------------------------------------------------------------------------------------------------------------------------------------------------|----------------------------------------------------------------------------------------------------|---------------------------------------|----------------------|----------------------------------------------------------------------------------------------------------|-------------------------------------------------------------------------------------------------------------------------------------------------------------------------------------------------------------------------------------------------------|
| Zheng et al, 2008 | 61 | Medical-surgical ICU<br><br>I):<br>APACHE II: 17.6 ± 2.9<br>ICU LOS: 9.3 ± 2.9<br>Duration MV: 7.9 ± 2.6<br><br>(C):<br>APACHE II: 17.6 ± 3.5<br>ICU LOS: 12.3 ± 5.7<br>Duration MV: 10.4 ± 0.9 | Criteria of United States of VAP clinical standard diagnosis of infection monitoring system (NNIS) | Age over 18 years and expected MV>48h | N/A                  | (I):<br>Special tracheal tube for SSD<br>Method of SSD: Continuous<br><br>(C):<br>Standard tracheal tube | Cointervention: N/A<br><br>VAP bundle:<br>- Semi-recumbent body position.<br>- Body position changes every 4h.<br>- Maintenance of cuff pressure between 25-30 cm H <sup>2</sup> O.                                                                   |
| Yang et al, 2008  | 91 | Medical-surgical ICU<br><br>I):<br>SAPS/APACHE: N/A<br>ICU LOS: N/A<br>Duration MV: N/A<br><br>(C):<br>SAPS/APACHE: N/A<br>ICU LOS: N/A<br>Duration MV: N/A                                     | Clinical features or positive tracheal/blood cultures or CPIS ≥ 5                                  | Age over 18 years and expected MV>48h | Intubated before ICU | (I):<br>SSD<br>Method of SSD: Continuous<br><br>(C):<br>Not SSD                                          | Cointervention: N/A<br><br>VAP bundle:<br>- Peptic ulcer prophylaxis with sucralfate.<br>- Endotracheal tube cuff control twice a day.<br>- Head elevated<br>- Open system single-use catheters<br>- Weekly circuit changes<br>- Oral decontamination |

**Table S5. Studies included in the systematic reviews with meta-analysis**

| Study             | n   | Characteristic of ICU/ patients                                                                                                                                                                                                                                        | Diagnosis of VAP                                                                                                                                                                               | Inclusion criteria  | Exclusion criteria | Intervention (I) and Control (C) groups                                                                                                      | Cointerventions <sup>a</sup> and VAP Bundle <sup>b</sup>                                                                                                                                                                                            |
|-------------------|-----|------------------------------------------------------------------------------------------------------------------------------------------------------------------------------------------------------------------------------------------------------------------------|------------------------------------------------------------------------------------------------------------------------------------------------------------------------------------------------|---------------------|--------------------|----------------------------------------------------------------------------------------------------------------------------------------------|-----------------------------------------------------------------------------------------------------------------------------------------------------------------------------------------------------------------------------------------------------|
| Bouza et al, 2008 | 690 | <p>Cardiothoracic surgery ICU</p> <p>I):<br/>APACHE II: 10.2 ± 2.4<br/>ICU LOS: 7 [3-27] <sup>c</sup><br/>Duration MV: 3 [2-9] <sup>c</sup></p> <p>(C):<br/>APACHE II: 10.4 ± 3.3<br/>ICU LOS: 16.5 [6.5-39.5] <sup>c</sup><br/>Duration MV: 7 [3-11] <sup>c</sup></p> | <p>MV&gt;48h, Clinical features (CDC criteria) and quantitative bacterial culture ≥10<sup>4</sup> CFU/ml from endotracheal aspiration and ≥10<sup>3</sup> CFU/ml from telescopic brushing.</p> | Major Heart Surgery | N/A                | <p>(I):<br/>Special tracheal tube for SSD (HI-Lo Evac)<br/>Method of SSD: Continuous</p> <p>(C):<br/>Standard tracheal tube (Hi-Contour)</p> | <p>Cointervention: None specified</p> <p>VAP bundle:</p> <ul style="list-style-type: none"> <li>- Tracheal aspiration.</li> <li>- Maintenance of cuff pressure between 20-30 mm Hg.</li> <li>- Pantoprazol for stress ulcer prophylaxis.</li> </ul> |

**Table S5. Studies included in the systematic reviews with meta-analysis**

| Study               | n   | Characteristic of ICU/ patients                                                                                                                                                                                    | Diagnosis of VAP                                                                                                      | Inclusion criteria | Exclusion criteria                                                                                                                                                                                            | Intervention (I) and Control (C) groups                                                                                                                                                                                | Cointerventions <sup>a</sup> and VAP Bundle <sup>b</sup>                                                                                                                                                                                                                                                                                                                                                                                                                                                                                                                                                                                                                                                                                    |
|---------------------|-----|--------------------------------------------------------------------------------------------------------------------------------------------------------------------------------------------------------------------|-----------------------------------------------------------------------------------------------------------------------|--------------------|---------------------------------------------------------------------------------------------------------------------------------------------------------------------------------------------------------------|------------------------------------------------------------------------------------------------------------------------------------------------------------------------------------------------------------------------|---------------------------------------------------------------------------------------------------------------------------------------------------------------------------------------------------------------------------------------------------------------------------------------------------------------------------------------------------------------------------------------------------------------------------------------------------------------------------------------------------------------------------------------------------------------------------------------------------------------------------------------------------------------------------------------------------------------------------------------------|
| Lorente et al, 2007 | 280 | <p>Medical-surgical ICU</p> <p>I):<br/>APACHE II: 14.9 ± 6.6<br/>ICU LOS: 14.1 ± 17.9<br/>Duration MV: 10.5 ± 15.9</p> <p>(C):<br/>APACHE II: 15.1 ± 6.3<br/>ICU LOS: 15.5 ± 19.9<br/>Duration MV: 11.1 ± 15.2</p> | Clinical features and quantitative culture of respiratory secretions by endotracheal aspirate >10 <sup>6</sup> CFU/ml | Expected MV>24h    | Age less than 18 years, pregnancy, infection with human immunodeficiency virus, blood leukocyte count less than 1,000 cells/mm <sup>3</sup> , solid or hematological tumor, and/or immunosuppressive therapy. | <p>(I):<br/>Special tracheal tube with polyurethane cuff and SSD (SealGuard Evac)<br/>Method of SSD: Intermittent every 1 h</p> <p>(C):<br/>Conventional endotracheal tube with polyvinyl cuff without SSD (Hi-Lo)</p> | <p>Cointervention: Polyurethane-cuffed</p> <p>VAP bundle:</p> <ul style="list-style-type: none"> <li>- Verification every 4h of semi-recumbent body position 40°</li> <li>- Nasogastric tubes.</li> <li>- Continuous enteric nutrition.</li> <li>- Ranitidine for stress ulcer prophylaxis.</li> <li>- Verification every 4h of cuff pressure to maintain a pressure of 25 cm H<sup>2</sup>O.</li> <li>- Oral cleaning with chlorhexidine every 8h.</li> <li>- Protocol of sedation.</li> <li>- Protocol for MV weaning.</li> <li>- No selective digestive decontamination.</li> <li>- Verification of gastric volume every 6h.</li> <li>- Tracheal suction when necessary.</li> <li>- No routine change of ventilator circuits.</li> </ul> |

**Table S5. Studies included in the systematic reviews with meta-analysis**

| Study           | n  | Characteristic of ICU/ patients                                                                                                                        | Diagnosis of VAP                                                                                                                                 | Inclusion criteria                    | Exclusion criteria                                                                                      | Intervention (I) and Control (C) groups                                                                      | Cointerventions <sup>a</sup> and VAP Bundle <sup>b</sup>                              |
|-----------------|----|--------------------------------------------------------------------------------------------------------------------------------------------------------|--------------------------------------------------------------------------------------------------------------------------------------------------|---------------------------------------|---------------------------------------------------------------------------------------------------------|--------------------------------------------------------------------------------------------------------------|---------------------------------------------------------------------------------------|
| Liu et al, 2006 | 86 | N/A<br><br>I):<br>SAPS/APACHE: N/A<br>ICU LOS: N/A<br>Duration MV: N/A<br><br>(C):<br>SAPS/APACHE: N/A<br>ICU LOS: N/A<br>Duration MV: N/A             | Clinical features and culture of endotracheal aspirate.                                                                                          | Age over 18 years and expected MV>48h | Expected death within 48h;<br>Expected weaning within 48h;<br>existing lung infection when MV beginning | (I):<br>Special tracheal tube for SSD<br>Method of SSD: Continuous<br><br>(C):<br>Standard endotracheal tube | Cointerventions: Semi-recumbent position and mosapride citrate<br><br>VAP bundle: N/A |
| Liu et al, 2006 | 98 | Respiratory ICU<br><br>I):<br>SAPS/APACHE: N/A<br>ICU LOS: N/A<br>Duration MV: N/A<br><br>(C):<br>SAPS/APACHE: N/A<br>ICU LOS: N/A<br>Duration MV: N/A | MV >48 h, the chest radiograph showed pulmonary new or progressive infiltrates, and excluding atelectasis, pulmonary edema, and pleural effusion | Age over 60 years and expected MV>48h | N/A                                                                                                     | D):<br>Special tracheal tube for SSD<br>Method of SSD: Intermittent<br><br>(C):<br>Standard tracheal tube    | Cointervention: N/A<br>VAP bundle: N/A                                                |



**Table S5. Studies included in the systematic reviews with meta-analysis**

| Study                | n   | Characteristic of ICU/ patients                                                                                                                                                               | Diagnosis of VAP                                                                                                                                                       | Inclusion criteria | Exclusion criteria                                             | Intervention (I) and Control (C) groups                                                                                                                             | Cointerventions <sup>a</sup> and VAP Bundle <sup>b</sup>                                                                                                                                                                                                                      |
|----------------------|-----|-----------------------------------------------------------------------------------------------------------------------------------------------------------------------------------------------|------------------------------------------------------------------------------------------------------------------------------------------------------------------------|--------------------|----------------------------------------------------------------|---------------------------------------------------------------------------------------------------------------------------------------------------------------------|-------------------------------------------------------------------------------------------------------------------------------------------------------------------------------------------------------------------------------------------------------------------------------|
| Girou et al, 2004    | 18  | 10-bed medical ICU<br><br>D):<br>APACHE II: 27 [20-40] <sup>c</sup><br>ICU LOS: N/A<br>Duration MV: N/A<br><br>(C):<br>APACHE II: 27 [24-33] <sup>c</sup><br>ICU LOS: N/A<br>Duration MV: N/A | Clinical features and quantitative culture of protected specimen brush or bronchoalveolar lavage specimen with more than 5% of cells containing intracellular bacteria | Expected MV>5 days | Patients intubated within the 15 days preceding ICU admission. | (I):<br>Special tracheal tube for SSD (HI-Lo Evac)<br>Semi-recumbent position<br>Method of SSD: Continuous<br><br>(C):<br>Standard tracheal tube<br>Supine position | Cointervention: Semi-recumbent position 30°.<br><br>VAP bundle:<br>- Sucralfate for stress ulcer prophylaxis.<br>- Verification every 8h of cuff pressure to maintain between 20-30 mm Hg.<br>- Verification every 4h of permeability of drainage system.                     |
| Smulders et al, 2002 | 105 | 12- bed general ICU<br><br>D):<br>APACHE II: 23.1 ± 7.6<br>ICU LOS: 9.3 ± 7.4<br>Duration MV: 5.8 ± 4.4<br><br>(C):<br>APACHE II: 22.3 ± 8.6<br>ICU LOS: 12.3 ± 3.6<br>Duration MV: 7.1 ± 5.4 | Adaptation of the American College of Chest Physicians. Clinical features and culture of endotracheal aspirate.                                                        | Expected MV>72 h   | MV<72 h<br>Pneumonia developed within 72h.                     | (I):<br>Special endotracheal tube for SSD (HI-Lo Evac)<br>Method of SSD: Intermittent<br><br>(C):<br>Standard endotracheal tube                                     | Cointervention: None specified<br><br>VAP bundle:<br>- Sucralfate for stress ulcer prophylaxis.<br>- Changes of body position from the right to the left decubitus every 4h.<br>- Endotracheal suction every 4h or according to need.<br>- Control of cuff pressure every 4h. |

**Table S5. Studies included in the systematic reviews with meta-analysis**

| Study              | n   | Characteristic of ICU/ patients                                                                                                                                                                          | Diagnosis of VAP                                                                                                | Inclusion criteria                                                                       | Exclusion criteria                                                              | Intervention (I) and Control (C) groups                                                                                                             | Cointerventions <sup>a</sup> and VAP Bundle <sup>b</sup>                                                                                                                                  |
|--------------------|-----|----------------------------------------------------------------------------------------------------------------------------------------------------------------------------------------------------------|-----------------------------------------------------------------------------------------------------------------|------------------------------------------------------------------------------------------|---------------------------------------------------------------------------------|-----------------------------------------------------------------------------------------------------------------------------------------------------|-------------------------------------------------------------------------------------------------------------------------------------------------------------------------------------------|
| Bo et al, 2000     | 68  | <p>Surgical ICU</p> <p>I):<br/>SAPS/APACHE: N/A<br/>ICU LOS: N/A<br/>Duration MV: N/A</p> <p>(C):<br/>SAPS/APACHE: N/A<br/>ICU LOS: N/A<br/>Duration MV: N/A</p>                                         | Quantitative bacterial culture of secretions obtained by protected specimen brush                               | Expected MV>72 h                                                                         | Intubated outside hospital; high-risk surgery or trauma; pre-existing infection | <p>D):<br/>Special tracheal tube for SSD<br/>Method of SSD: Continuous</p> <p>(C):<br/>Standard tracheal tube</p>                                   | <p>Cointervention: None specified</p> <p>VAP bundle:<br/>- Intra-cuff pressure monitored every 4h.<br/>- Stress ulcer prophylaxis with histamine-2 receptor or proton pump inhibitor.</p> |
| Kollef et al, 1999 | 343 | <p>Cardiothoracic ICU</p> <p>I):<br/>APACHE II: 11.1 ± 3.7<br/>ICU LOS: 3.7 ± 4.6<br/>Duration MV: 1.5 ± 3.3</p> <p>(C):<br/>APACHE II: 11.0 ± 3.6<br/>ICU LOS: 3.2 ± 4.5<br/>Duration MV: 1.9 ± 5.1</p> | Adaptation of the American College of Chest Physicians. Clinical features and culture of endotracheal aspirate. | Age >18 years and required MV in the cardiothoracic ICU after undergoing cardiac surgery | Patients transferred from an outside hospital and had already received MV       | <p>(I):<br/>Special endotracheal tube for SSD (HI-Lo Evac)<br/>Method of SSD: Continuous</p> <p>(C):<br/>Standard endotracheal tube without SSD</p> | <p>Cointervention: None specified</p> <p>VAP bundle:<br/>- Head elevated<br/>- Circuit change<br/>- Stress ulcer prophylaxis (not specific drug data)</p>                                 |

**Table S5. Studies included in the systematic reviews with meta-analysis**

| Study              | n   | Characteristic of ICU/ patients                                                                                                                                      | Diagnosis of VAP                                                                                                                                                                                                | Inclusion criteria                                                 | Exclusion criteria                                                                                                                     | Intervention (I) and Control (C) groups                                                                                                                                                                                     | Cointerventions <sup>a</sup> and VAP Bundle <sup>b</sup>                                                                                                                                                              |
|--------------------|-----|----------------------------------------------------------------------------------------------------------------------------------------------------------------------|-----------------------------------------------------------------------------------------------------------------------------------------------------------------------------------------------------------------|--------------------------------------------------------------------|----------------------------------------------------------------------------------------------------------------------------------------|-----------------------------------------------------------------------------------------------------------------------------------------------------------------------------------------------------------------------------|-----------------------------------------------------------------------------------------------------------------------------------------------------------------------------------------------------------------------|
| Valles et al, 1995 | 153 | Medical-surgery ICU<br><br>I):<br>APACHE II: 20.5 ± 7.0<br>ICU LOS: N/A<br>Duration MV: N/A<br><br>(C):<br>APACHE II: 18.9 ± 7.1<br>ICU LOS: N/A<br>Duration MV: N/A | Clinical features after 72h of MV and protected specimen brush culture containing >10 <sup>3</sup> CFU/ml or bronchoalveolar lavage culture with >10 <sup>4</sup> CFU/ml or good response to antibiotic agents. | Expected MV>72h, intubation in ICU or in the emergency department. | Patients intubated in other areas of the hospital, tracheostomy, develop pneumonia during the first 72 hours of MV                     | (I):<br>Special tracheal tube for SSD (HI-Lo Evac)<br>Method of SSD: Continuous<br><br>(C):<br>HI-Lo Evac with SSD lumen closed                                                                                             | Cointervention: None specified<br><br>VAP bundle:<br>- Intra-cuff pressure monitored every 4h.<br>- Stress ulcer prophylaxis with sucralfate.<br>- No selective decontamination regimen or antibiotic prophylaxis.    |
| Mahul et al, 1992  | 145 | Medical-surgical ICU<br><br>I):<br>SAPS/APACHE: N/A<br>ICU LOS: N/A<br>Duration MV: N/A<br><br>(C):<br>SAPS/APACHE: N/A<br>ICU LOS: N/A<br>Duration MV: N/A          | New and persistent infiltrate on the chest X-ray after 2 days of intubation and aerobic microorganism on bronchoalveolar lavage culture ≥ 10 <sup>5</sup> CFR/ml.                                               | Expected MV>3 days                                                 | No intubation, tracheostomy, intubated <3 days, vital risk for new intubation, intubated before ICU, gastric bleeding, oesogastrectomy | (I):<br>Special tracheal tube for SSD (HI-Lo Evac) with/without stress ulcer prophylaxis<br>Method of SSD: Intermittent every 1h<br><br>(C):<br>HI-LO EVAC tube without SSD technique with/without stress ulcer prophylaxis | Cointervention: Stress ulcer prophylaxis:<br>Antacids (aluminum hydroxide) 20ml/6h or cytoprotective agent (sucralfate) 1g/6h.<br><br>VAP bundle:<br>- Intra-cuff pressure monitored every 8h and kept up to 30mm Hg. |

MV, mechanical ventilation; ICU, intensive care unit; I, intervention; C, control; CPIS, Clinical infection pulmonary score; SSD, subglottic secretion drainage; PEEP, positive end-expiratory pressure; CFU, colony-forming units; CDC, Centers for Disease Control and Prevention; APACHE II, Acute Physiology and Chronic Health Evaluation; SAPS II, Simplified Acute Physiologic Score; LOS, length of stay.

<sup>a</sup> Cointervention only in intervention group.

<sup>b</sup> VAP bundle carried out in both groups: control and intervention.

<sup>c</sup> Median [IQR]
